# Supplementary material
Source: PubMed Central journal article supplement (PMC3163381)
Supplement: NIHMS314278-supplement-1_si_001.pdf [file NIHMS314278-supplement-1_si_001.pdf]

## Supplemental Figures

### Effects on membrane lateral pressure suggest permeation mechanisms for bacterial quorum signaling molecules

Kishore Kamaraju<sup>1</sup>, Jacqueline Smith<sup>2</sup>, Jingxin Wang<sup>2</sup>, Varnika Roy<sup>3,4</sup>, Herman O. Sintim<sup>2,5</sup>, William Bentley<sup>3,4</sup> and Sergei Sukharev<sup>1</sup>

*Department of Biology<sup>1</sup>, Department of Chemistry and Biochemistry<sup>2</sup> Graduate Program in Molecular and Cell Biology<sup>3</sup> and Fischell Department of Bioengineering<sup>4</sup>, Host-Pathogen Graduate Program<sup>5</sup>, University of Maryland, College Park, Maryland 20742*

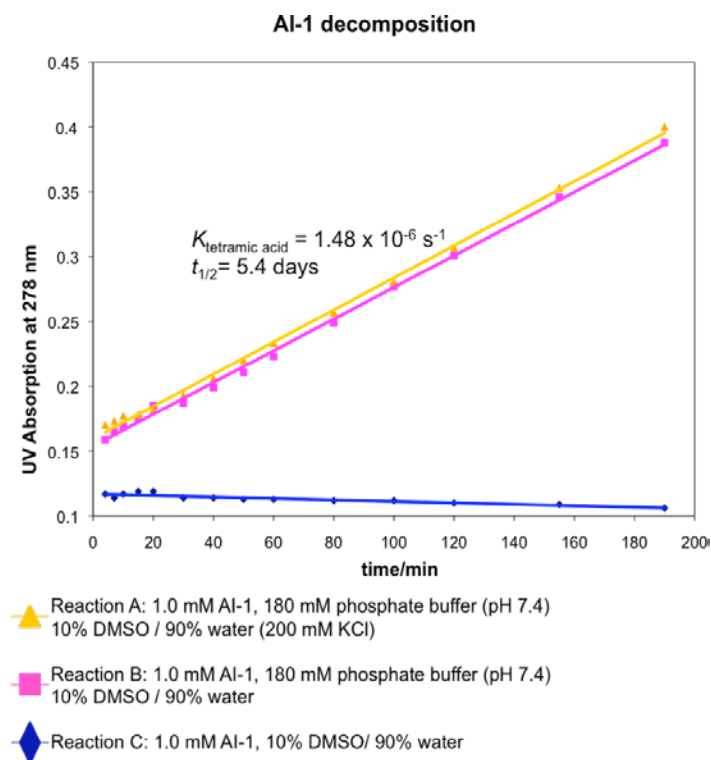

**Figure S1.** 3-oxo- $C_{12}$ -AHL (AI-1) does not decompose into tetramic acid at neutral pH (7.0). Solid 3-oxo- $C_{12}$ -AHL (AI-1) was stored at  $-20^\circ\text{C}$  and a 20 mM stock solution in DMSO was always freshly prepared and used immediately. Reactions A-C (100  $\mu\text{L}$ , in UV cuvettes (10 mm pathlength), temperature =  $25^\circ\text{C}$ ) were monitored by following the UV absorbance of tetramic acid at 278 nm ( $\epsilon = 13,900 \text{ M}^{-1}\text{cm}^{-1}$ , see Kaufmann et al. *Proc. Natl. Acad. Sci. USA*. 2005, 102(2), 309-14). The rate constants for reactions A (phosphate buffer + KCl) and B (phosphate buffer) were both determined to be  $1.48 \times 10^{-6} \text{ s}^{-1}$  (similar to the value,  $1.49 \times 10^{-6} \text{ s}^{-1}$ , reported in ref. 1). Interestingly, no decomposition of 3-oxo- $C_{12}$ -AHL into tetramic acid was observed when the reaction was conducted in 10% DMSO/ 90% deionized water (reaction C).

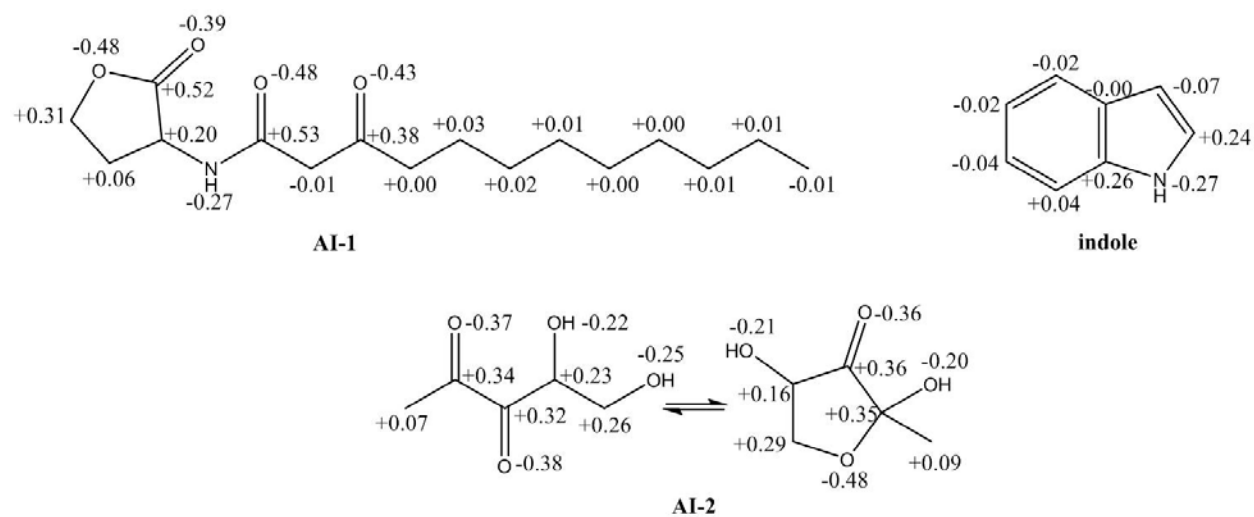

**Figure S2.** Chemical structures and partial charges for the natural AIs. The atomic charges were calculated with Gaussian 09 software (11) at B3LYP/6-31G(d) level. All the hydrogen charges were summed into the adjacent heavy atoms such as C, N and O.

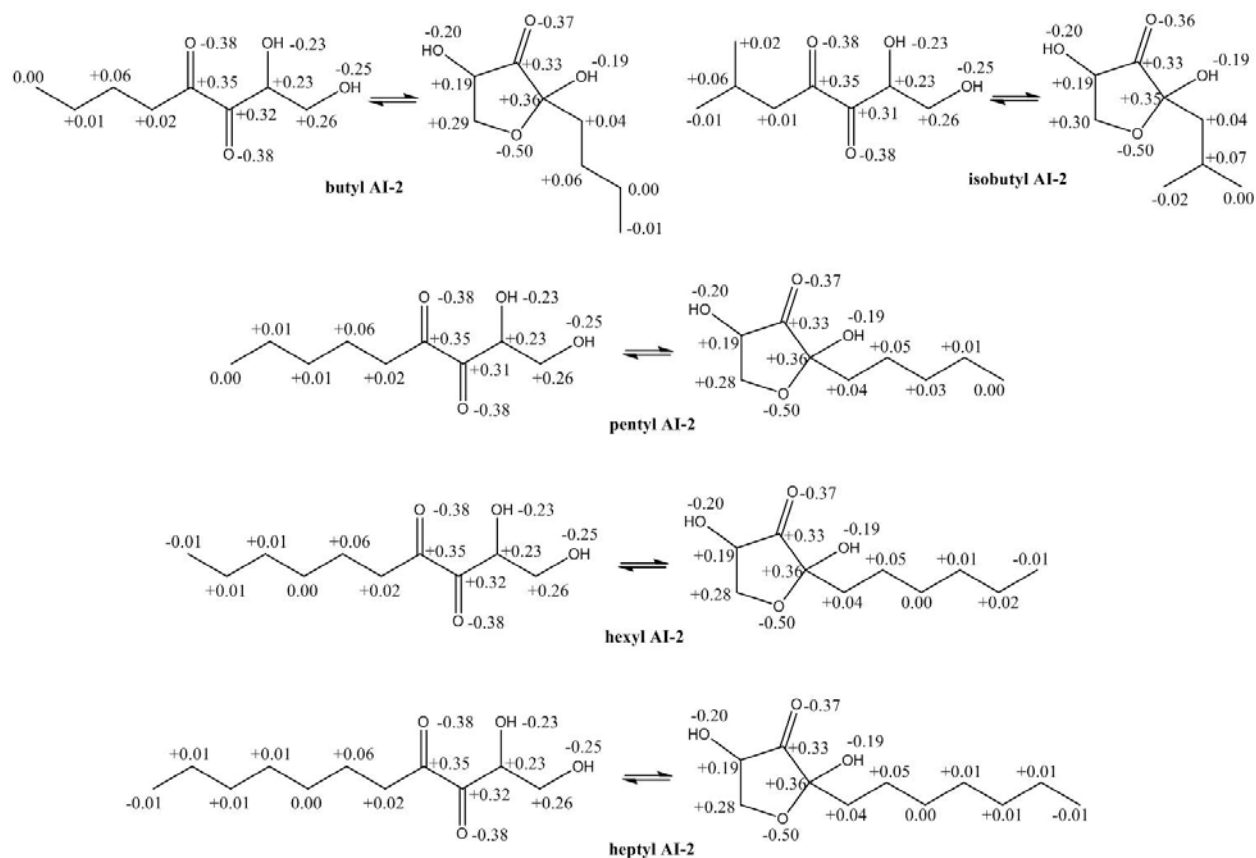

**Figure S3.** Chemical structures and partial charges for alkylated analogs of AI-2. The atomic charges were calculated with Gaussian 09 software (11) at B3LYP/6-31G(d) level. All the hydrogen charges were summed into the adjacent heavy atoms such as C, N and O.
